# Supplementary material for: Natural interfaces and virtual environments for the acquisition of street crossing and path following skills in adults with Autism Spectrum Disorders: a feasibility study
Source: PubMed Central journal article supplement (PMC4344805; doi:10.1186/s12984-015-0010-z), 2015-02-19

# 1. Where do you have to walk?

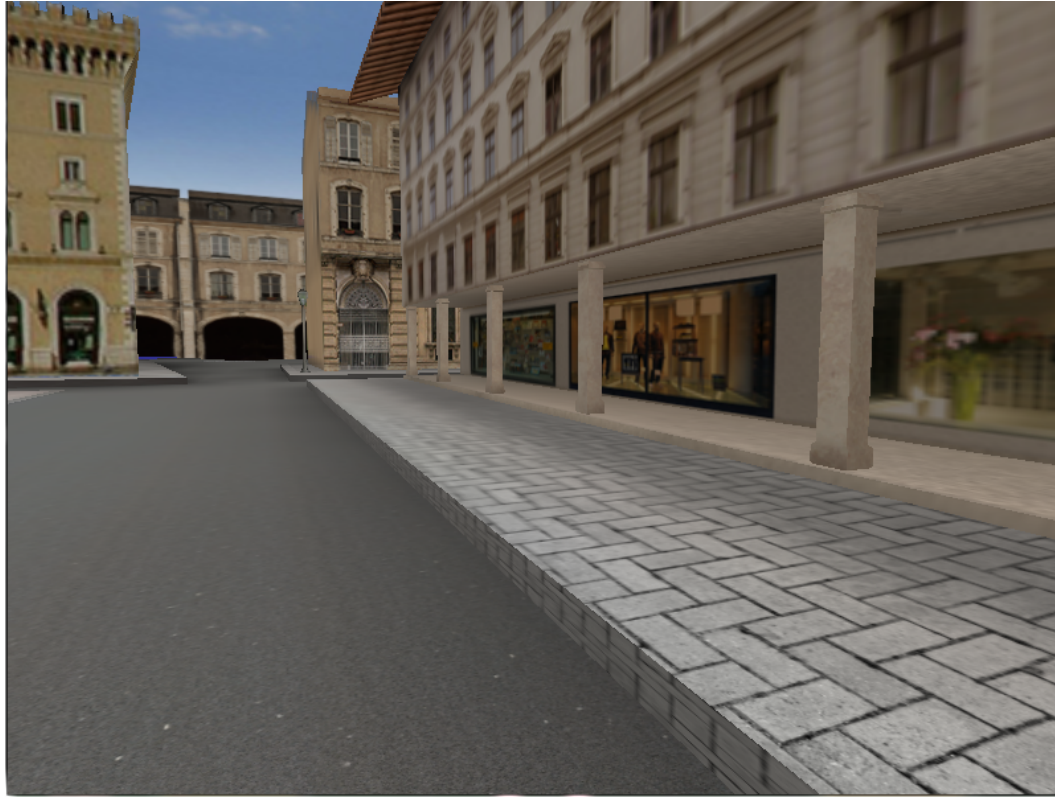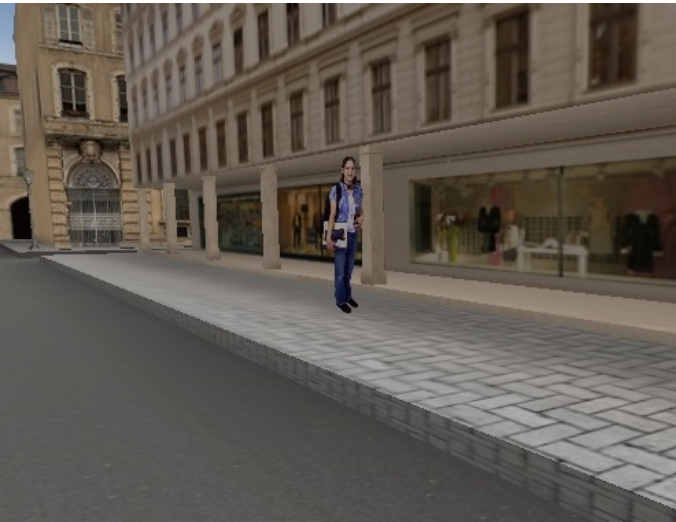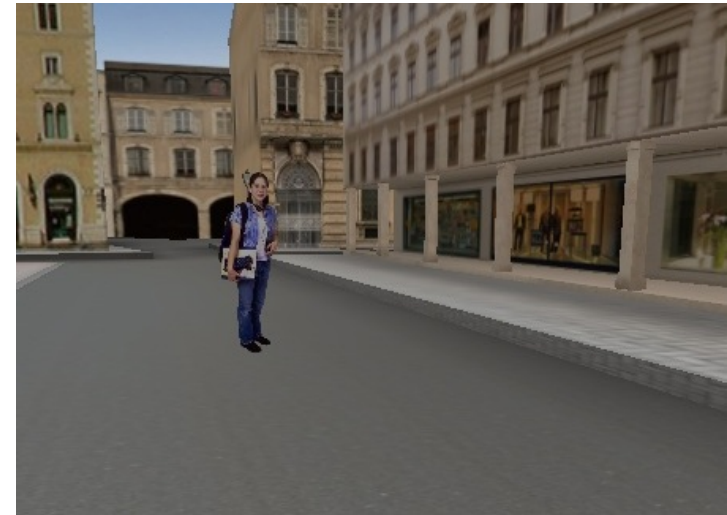

## 2. Where do you have to cross?

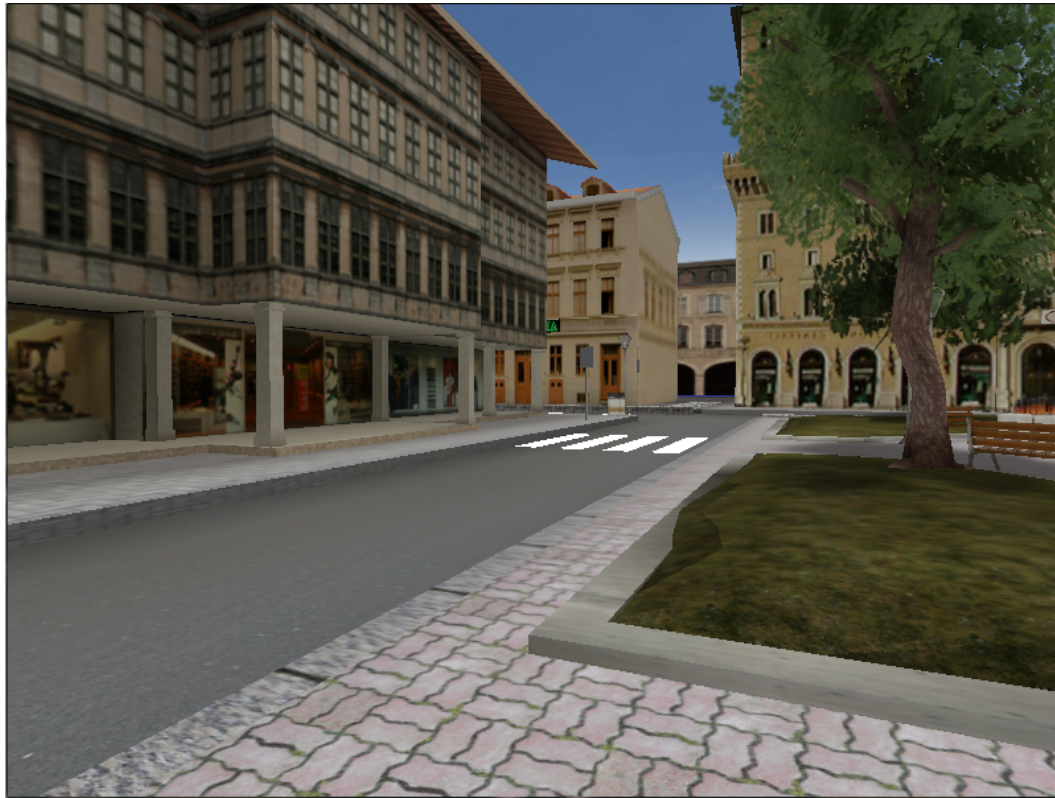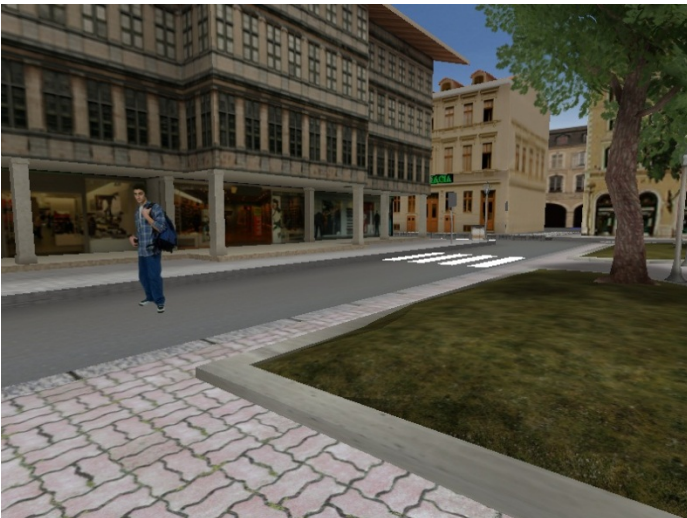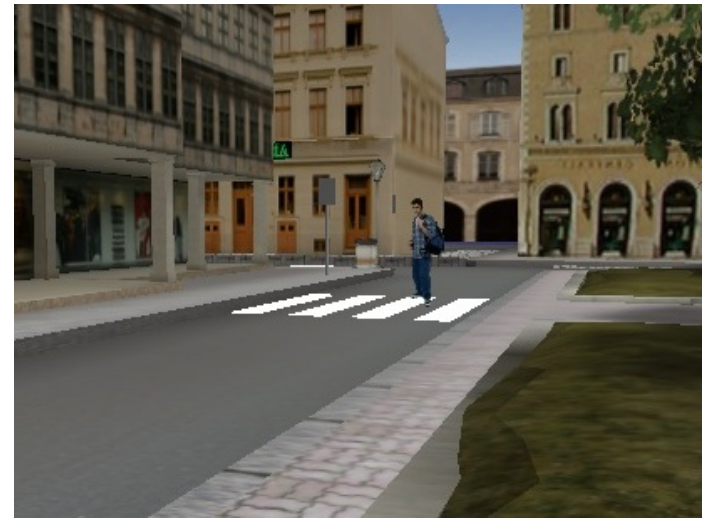

### 3. The traffic light is red. What do you do in this situation?

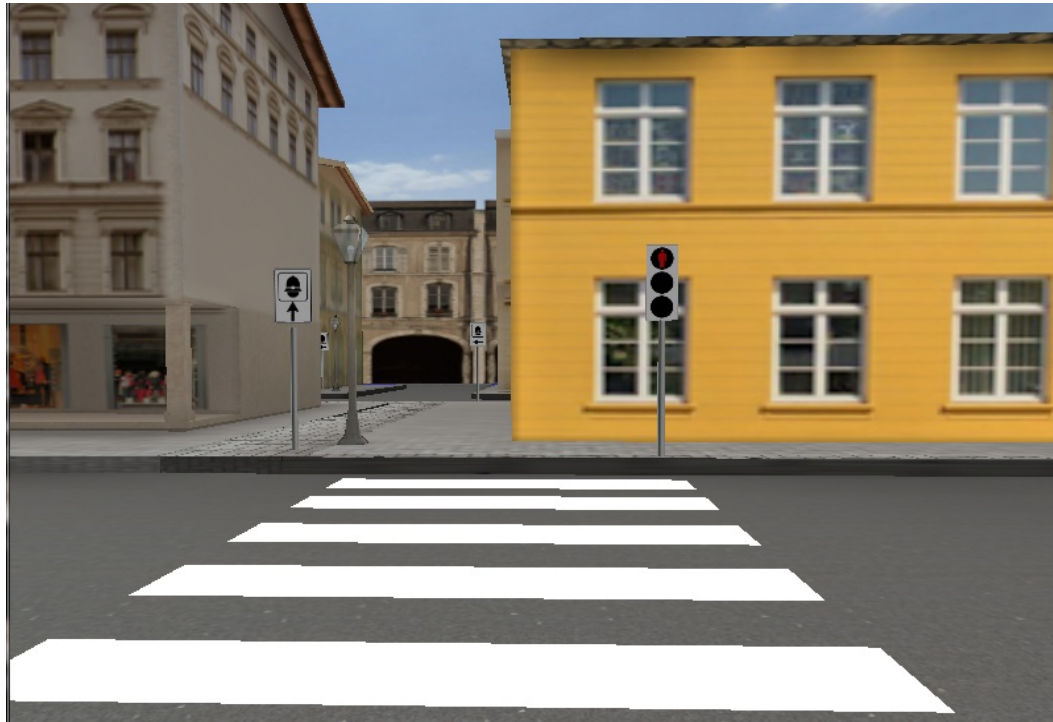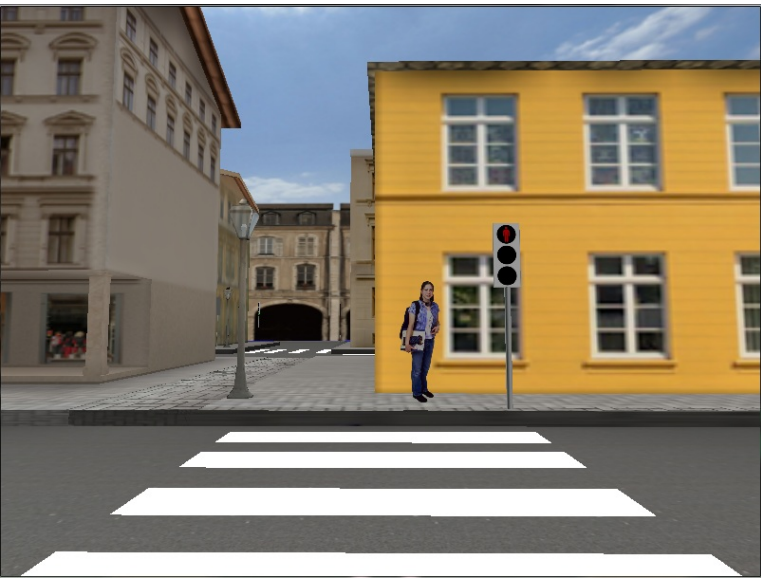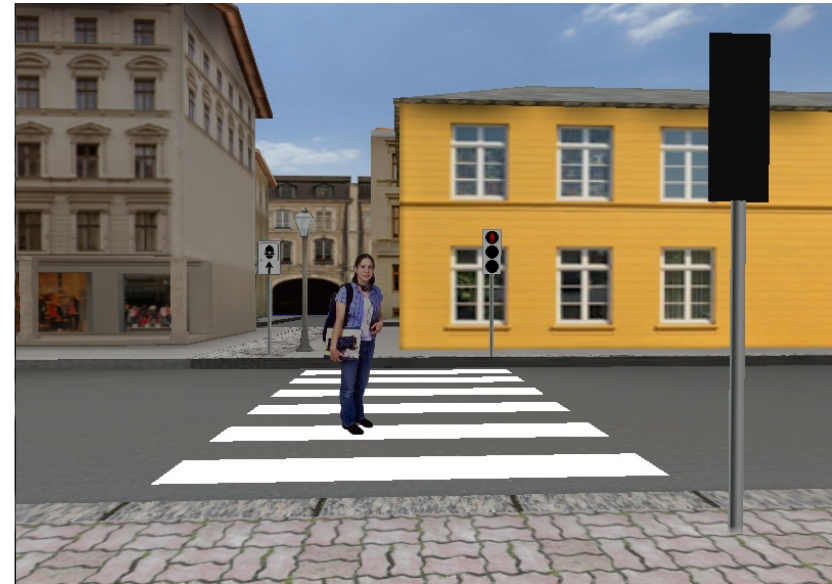

#### 4. The traffic light is yellow. What do you do in this situation?

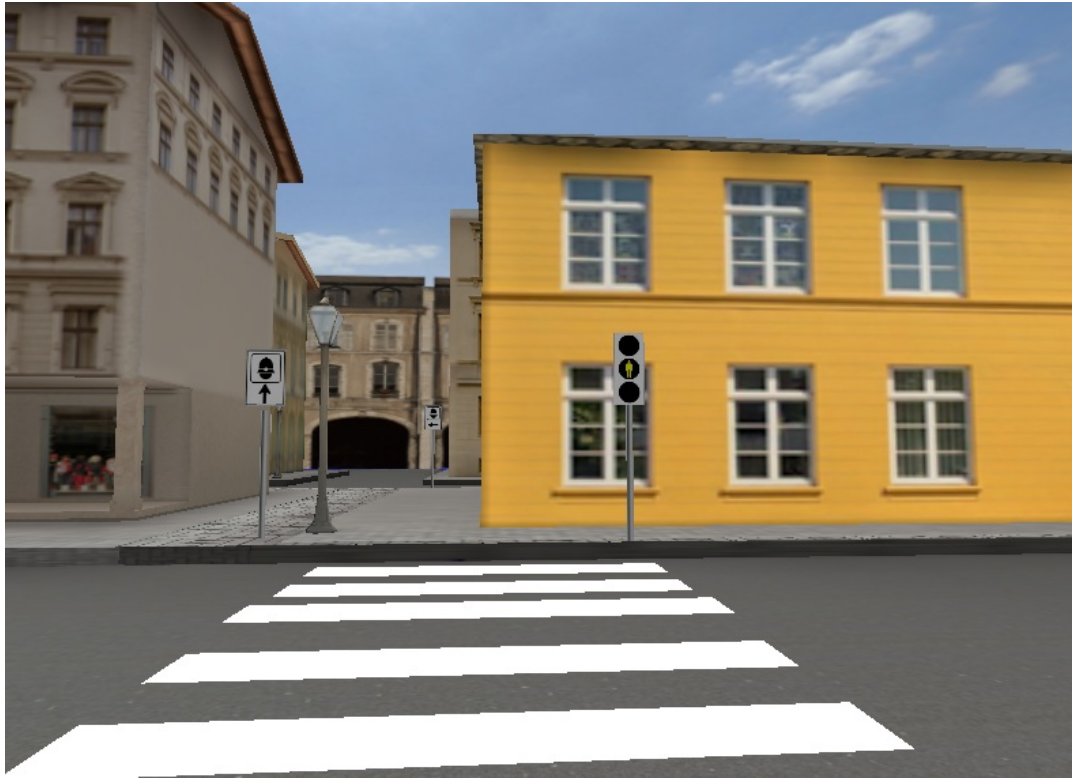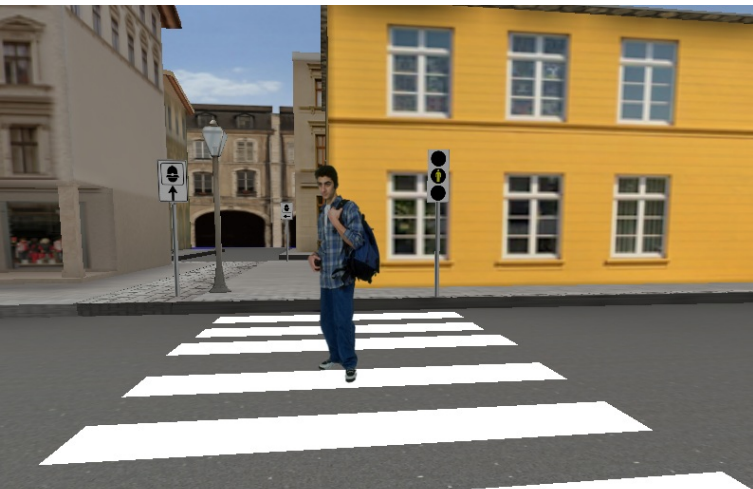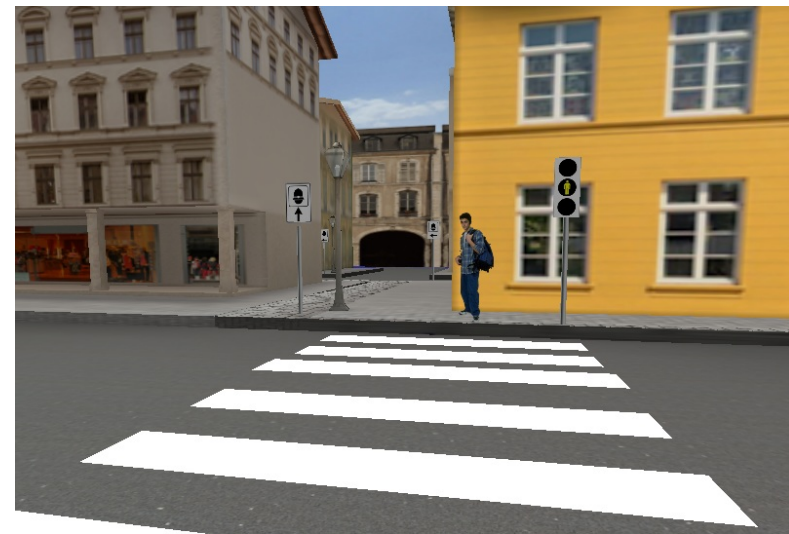

## 5. The traffic light is green. What do you do in this situation?

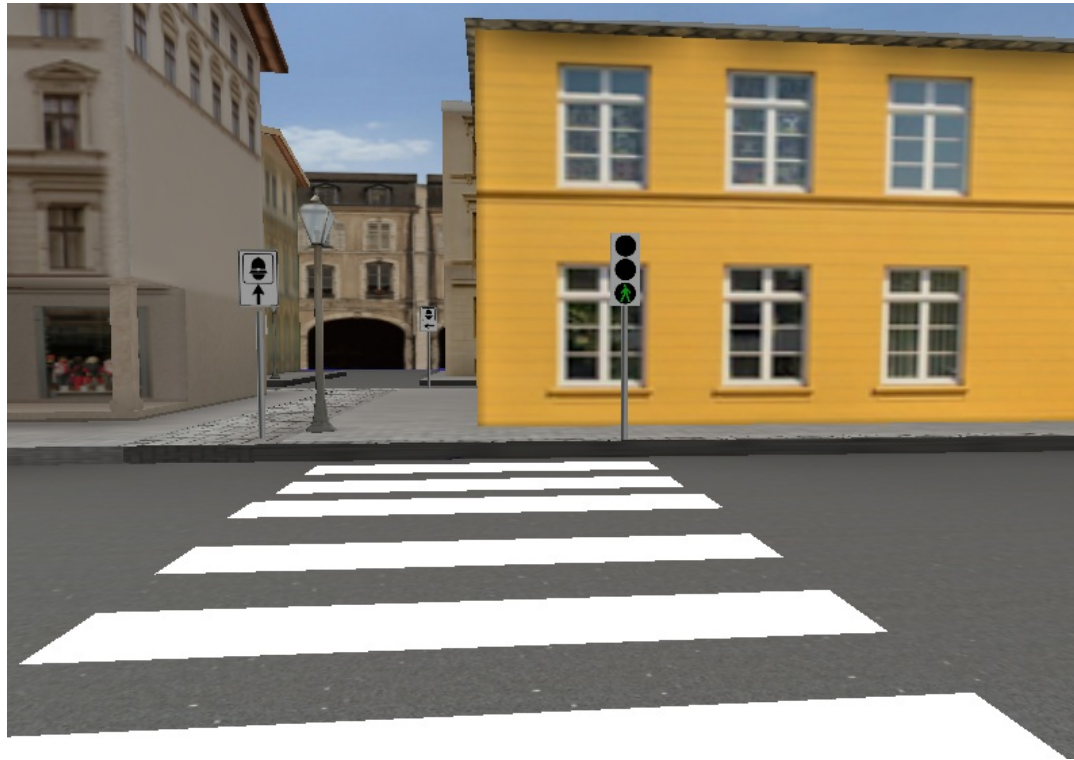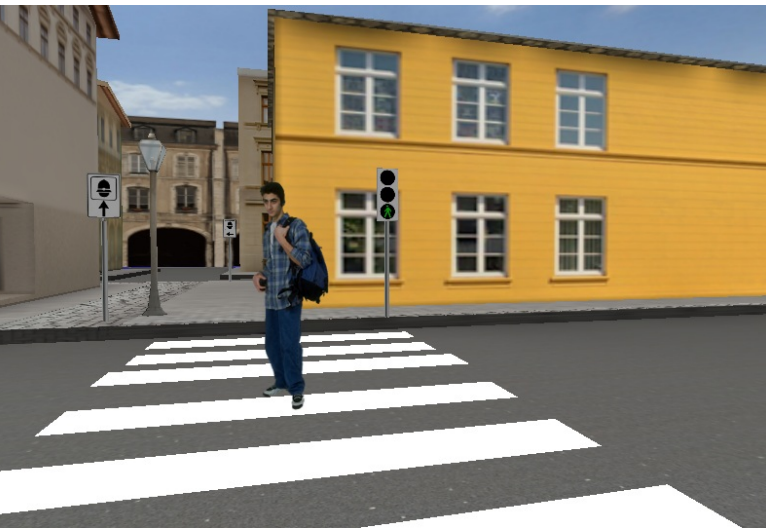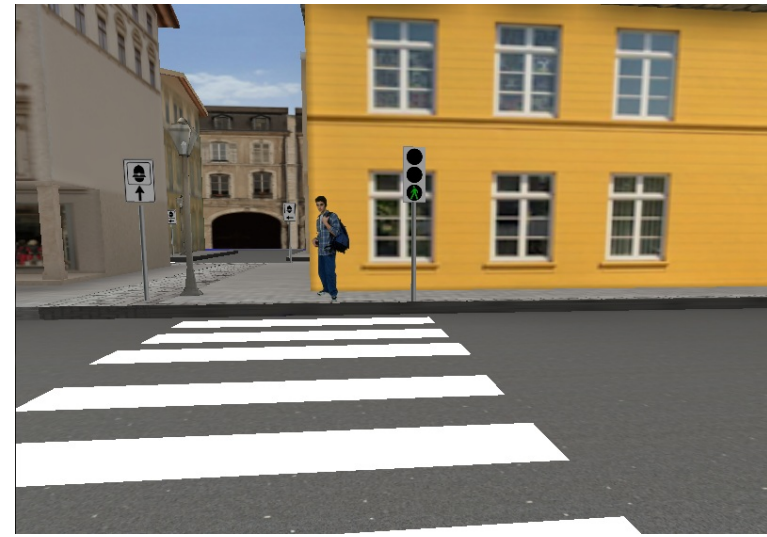

## 6. What should you do if a traffic light is not present or is not working?

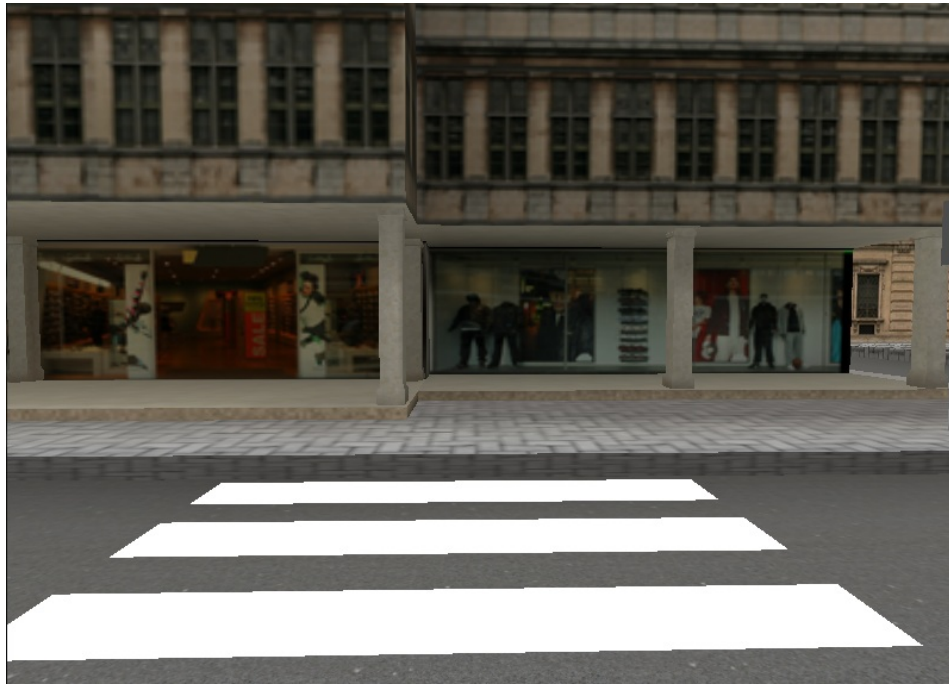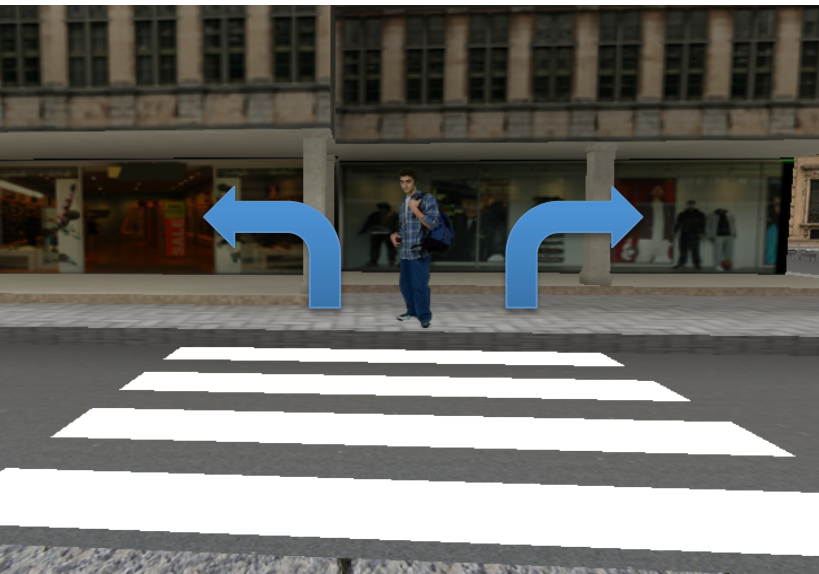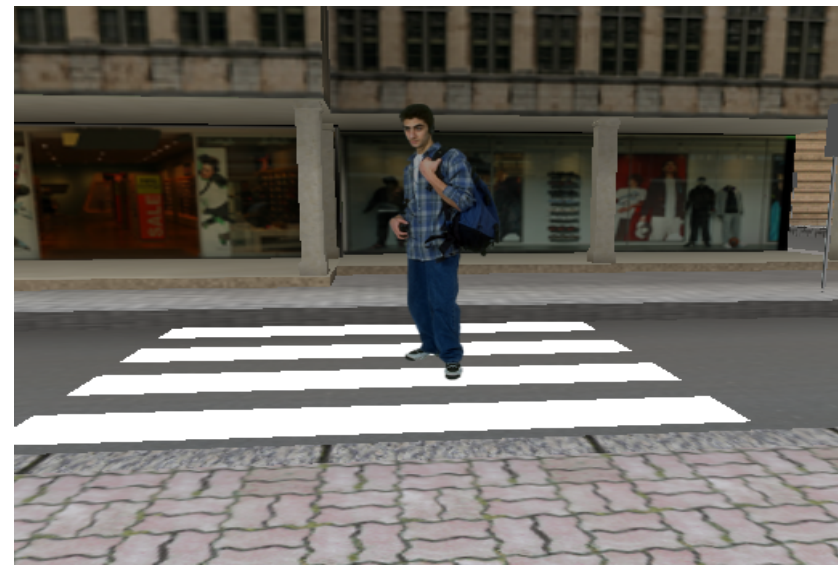

Supplement: 12984_2015_10_MOESM1_ESM.pdf [file 12984_2015_10_MOESM1_ESM.pdf]
