# Supplementary material for: Natural interfaces and virtual environments for the acquisition of street crossing and path following skills in adults with Autism Spectrum Disorders: a feasibility study
Source: PubMed Central journal article supplement (PMC4344805; doi:10.1186/s12984-015-0010-z), 2015-02-19
Supplement: 12984_2015_10_MOESM2_ESM.pdf [file 12984_2015_10_MOESM2_ESM.pdf]

|         |  |
|---------|--|
| Subject |  |
| Date    |  |

- Parent
- Caregiver
- PRE-treatment
- POST-treatment

Can the subject identify where to walk when he/she is outside in the streets?

|   |   |   |   |   |   |
|---|---|---|---|---|---|
| 0 | 1 | 2 | 3 | 4 | 5 |
|---|---|---|---|---|---|

Can the subject identify where to cross when he/she is outside in the streets?

|   |   |   |   |   |   |
|---|---|---|---|---|---|
| 0 | 1 | 2 | 3 | 4 | 5 |
|---|---|---|---|---|---|

Does the subject wait when the traffic light is red?

|   |   |   |   |   |   |
|---|---|---|---|---|---|
| 0 | 1 | 2 | 3 | 4 | 5 |
|---|---|---|---|---|---|

Does the subject wait when the traffic light is yellow?

|   |   |   |   |   |   |
|---|---|---|---|---|---|
| 0 | 1 | 2 | 3 | 4 | 5 |
|---|---|---|---|---|---|

Does the subject cross when the traffic light is green?

|   |   |   |   |   |   |
|---|---|---|---|---|---|
| 0 | 1 | 2 | 3 | 4 | 5 |
|---|---|---|---|---|---|

When the traffic light is off, does the subject look to the right and to the left before crossing?

|   |   |   |   |   |   |
|---|---|---|---|---|---|
| 0 | 1 | 2 | 3 | 4 | 5 |
|---|---|---|---|---|---|

#### Legend

0= behavior absent

5=behavior is always present
